# Supplementary material for: Yield and Mineral Composition among Mungbean [Vigna radiata (L.) R. Wilczek] Genotypes Grown in Different Agroecologies in East Africa
Source: Hindawi journal article supplement (doi:10.1155/2023/5534650), 2023-10-25
Supplement: f1 [file 5534650.f1.zip]

Archive with 3 entries (3 files):
- S1.pdf
- S2.pdf
- S3.pdf
