# Supplementary figures and images for: Yield and Mineral Composition among Mungbean [Vigna radiata (L.) R. Wilczek] Genotypes Grown in Different Agroecologies in East Africa
Source: Hindawi journal article supplement (doi:10.1155/2023/5534650), 2023-10-25

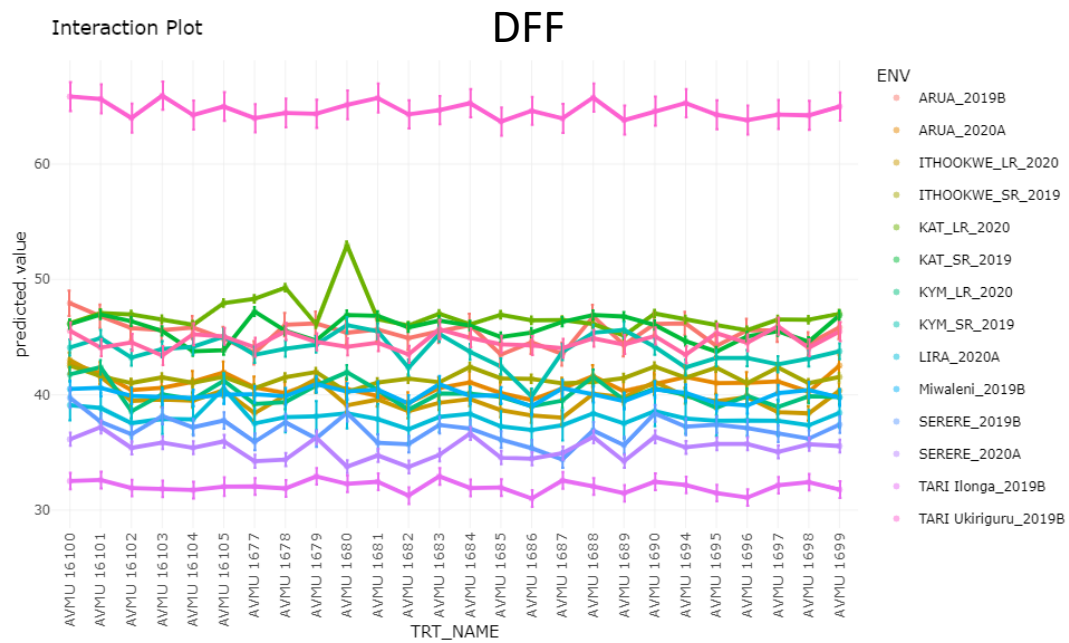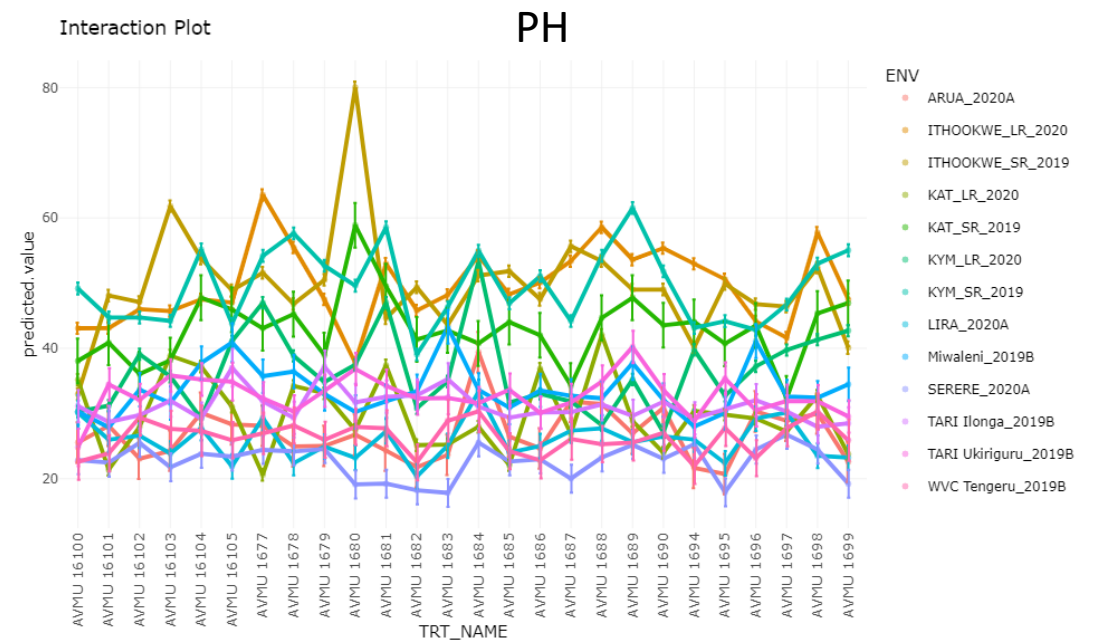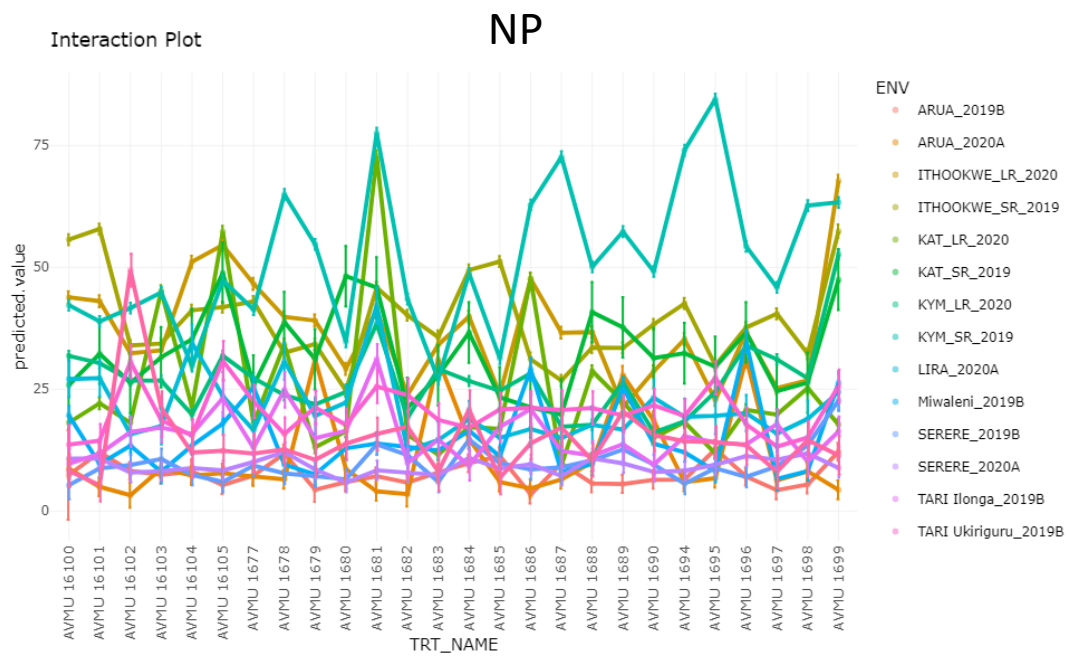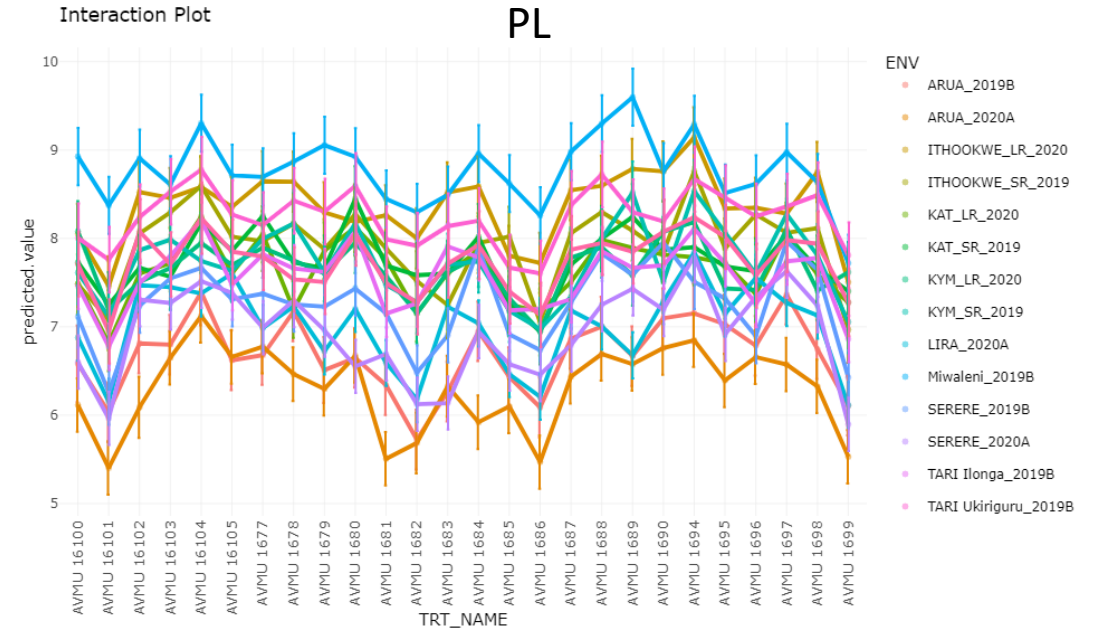

Supplement: f1 [file 5534650.f1.zip › S1.pdf]

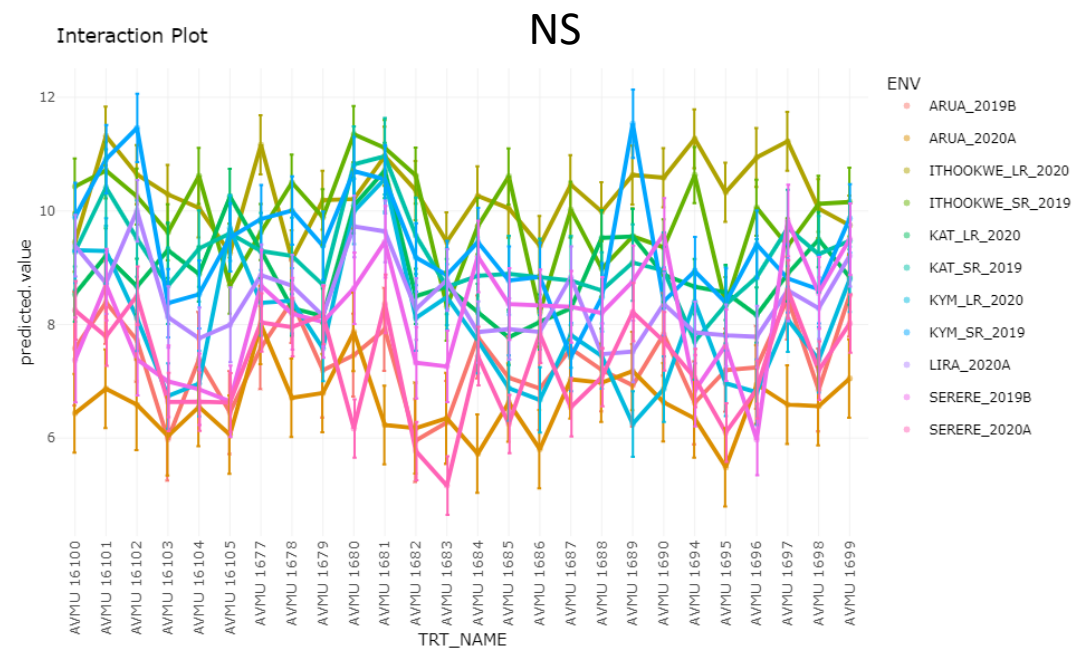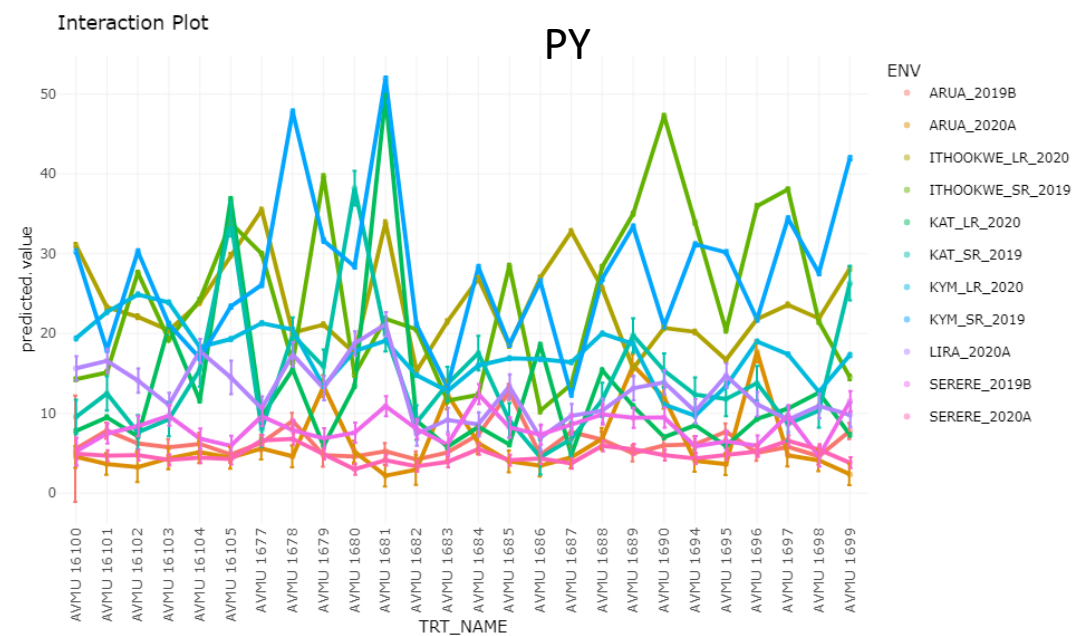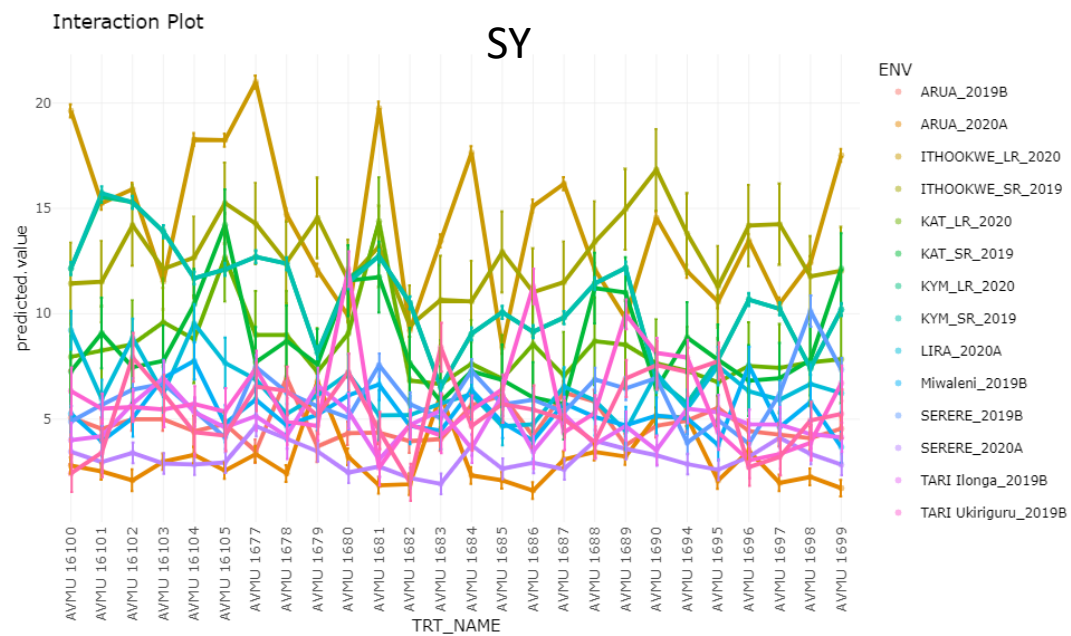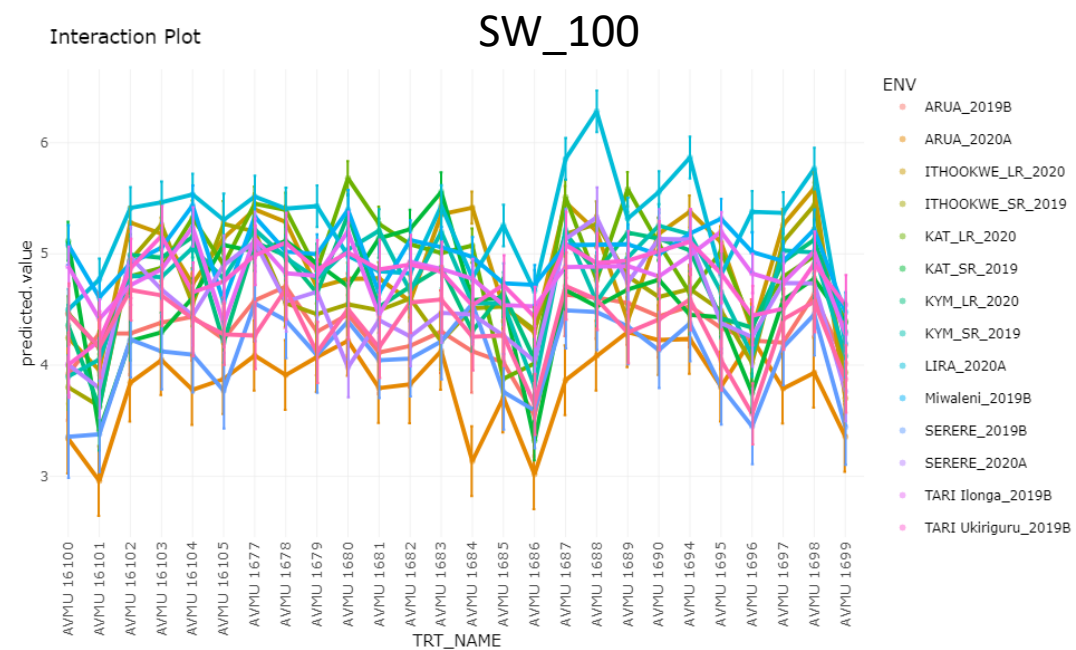

Supplement: f1 [file 5534650.f1.zip › S2.pdf]

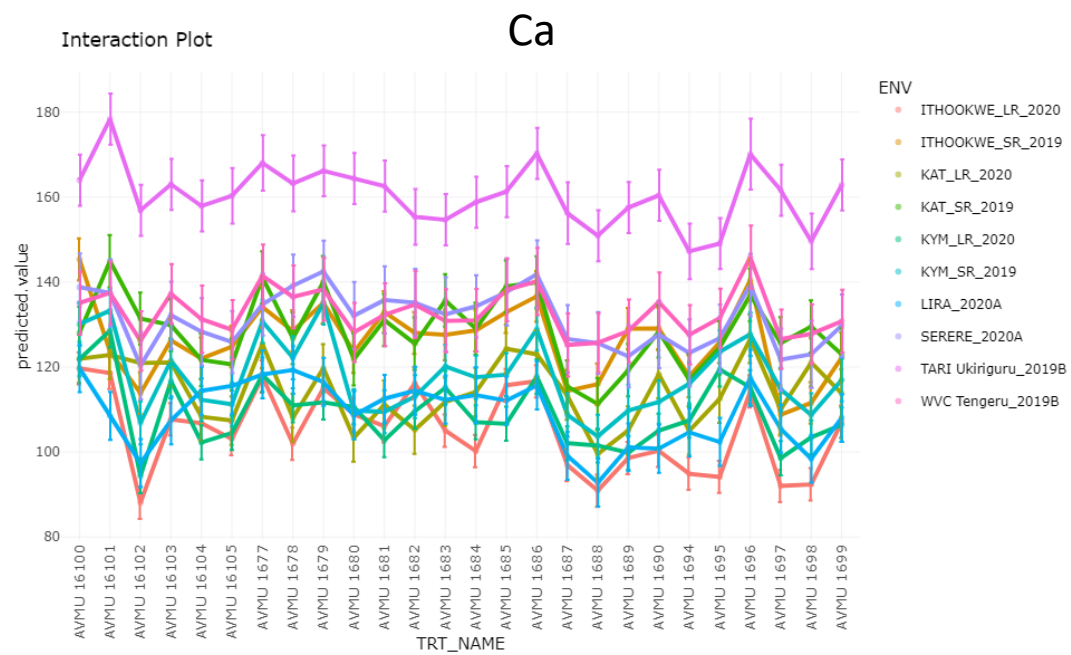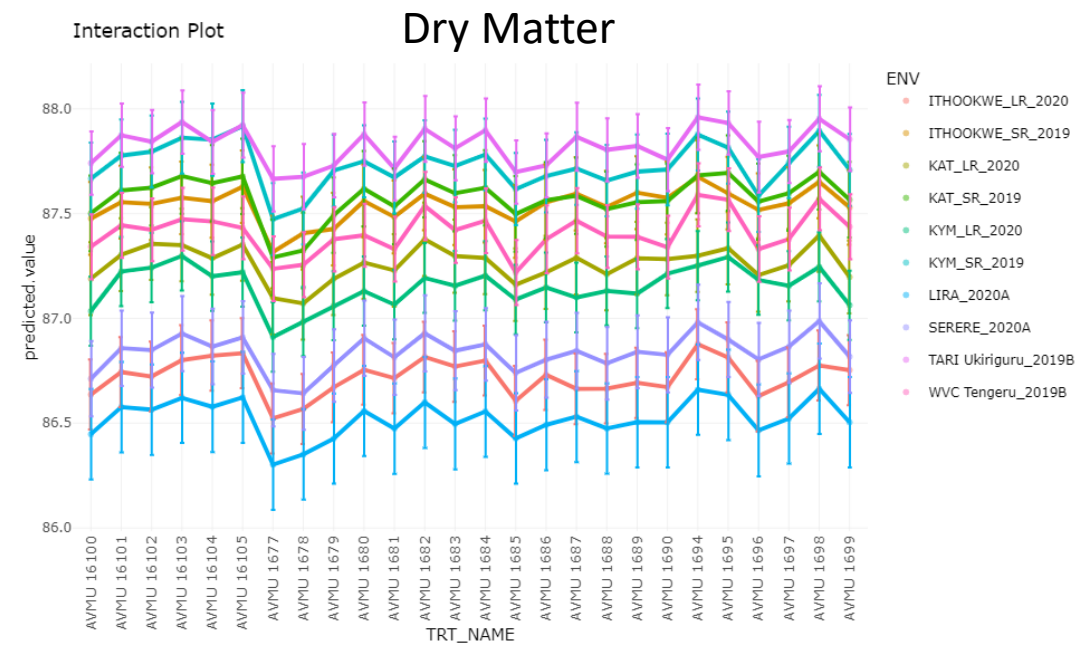

Supplement: f1 [file 5534650.f1.zip › S3.pdf]
